# Supplementary material
Source: publisher figshare collection journal article supplement (https://diabetesjournals.figshare.com/articles/dataset/_/24451756)

- Vehicle
- GIP (30 nmol/kg)
- ▲ GIP + GIPR antagonist Ab (0.3 mg/kg)
- ▼ GIP + GIPR antagonist Ab (1 mg/kg)
- ◆ GIP + GIPR antagonist Ab (3 mg/kg)
- GIP + GIPR antagonist Ab (10 mg/kg)
- ✱ GIP + GIPR antagonist Ab (30 mg/kg)
- GIPR antagonist Ab (30 mg/kg)

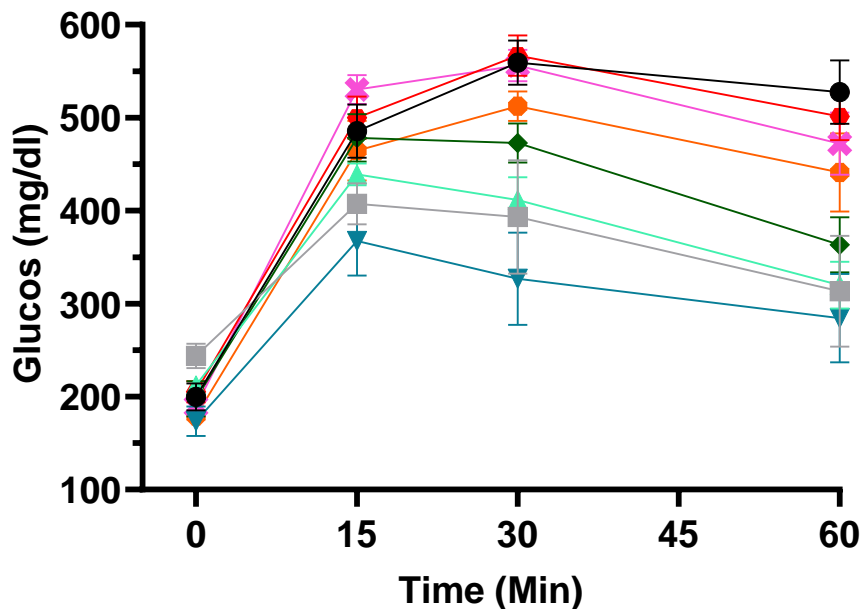

Supplement: Supplementary file 1 [file 1]
