# Supplementary material
Source: publisher figshare collection journal article supplement (https://diabetesjournals.figshare.com/articles/dataset/_/24451756)

**A**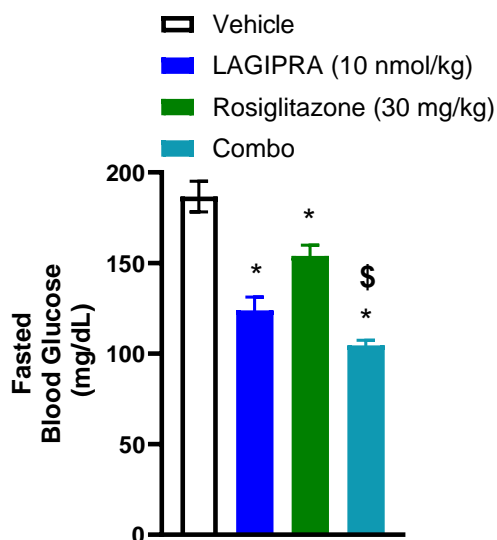**B**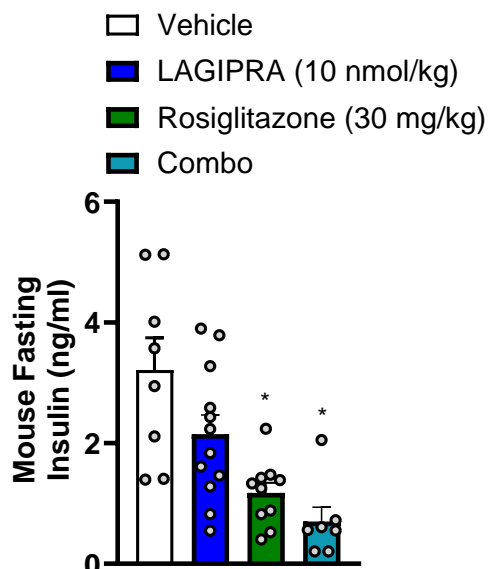**C**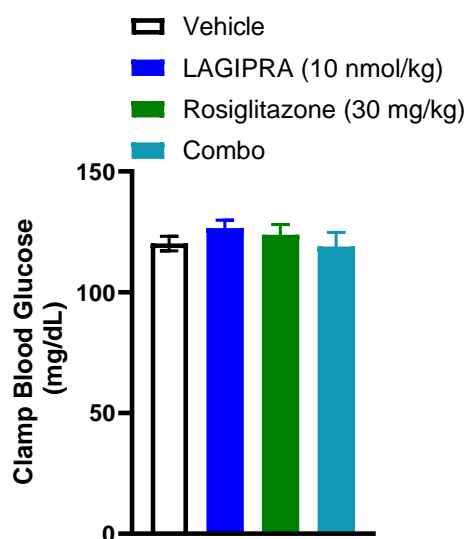**D**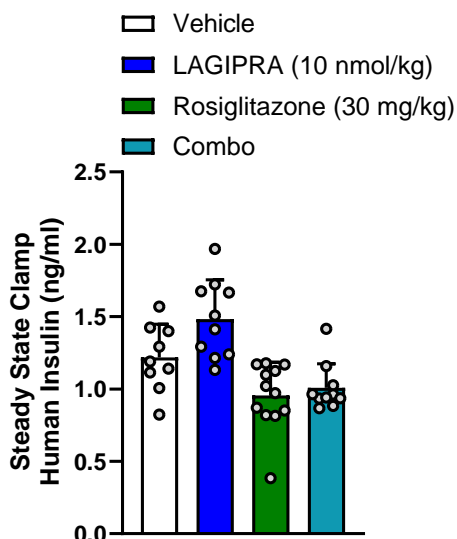**E**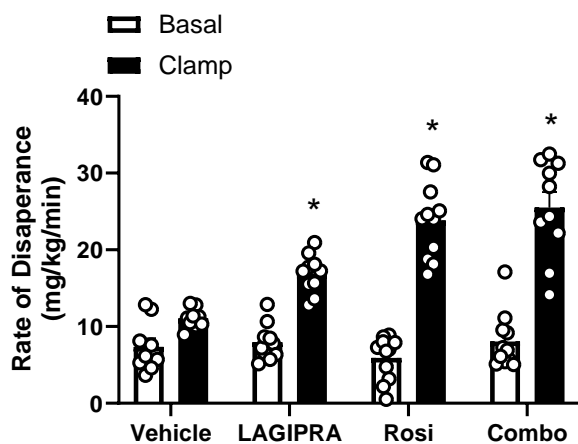**F**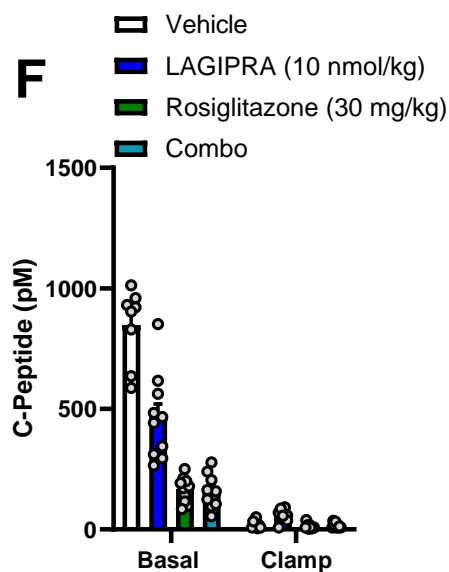

Supplement: Supplementary file 2 [file 1]

**A**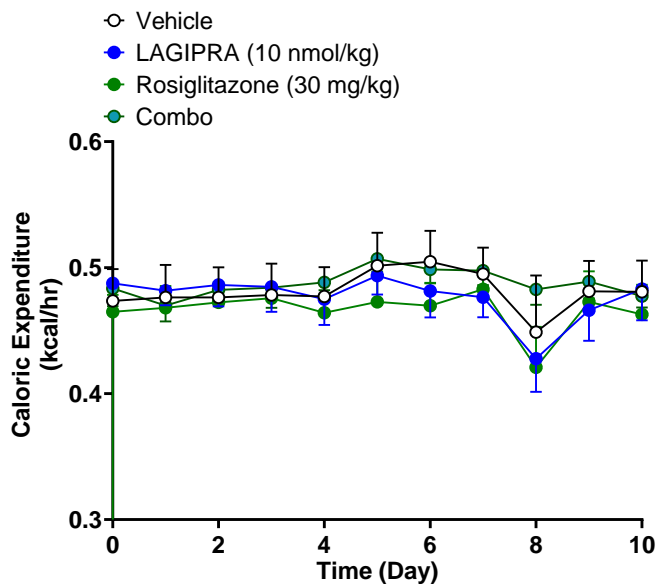**B**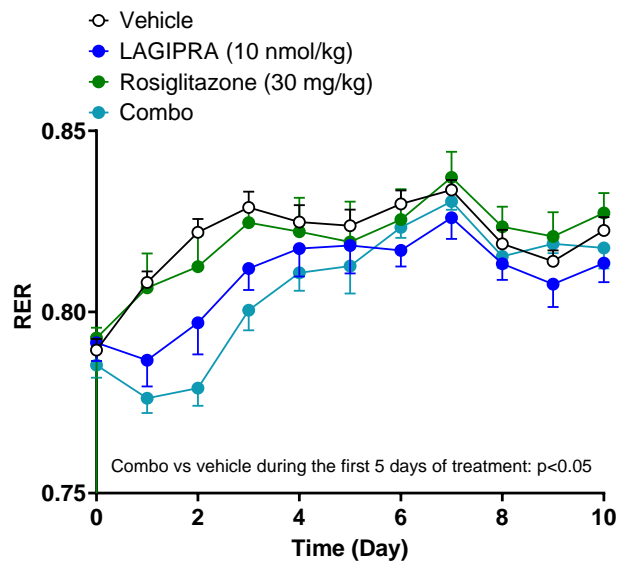**C**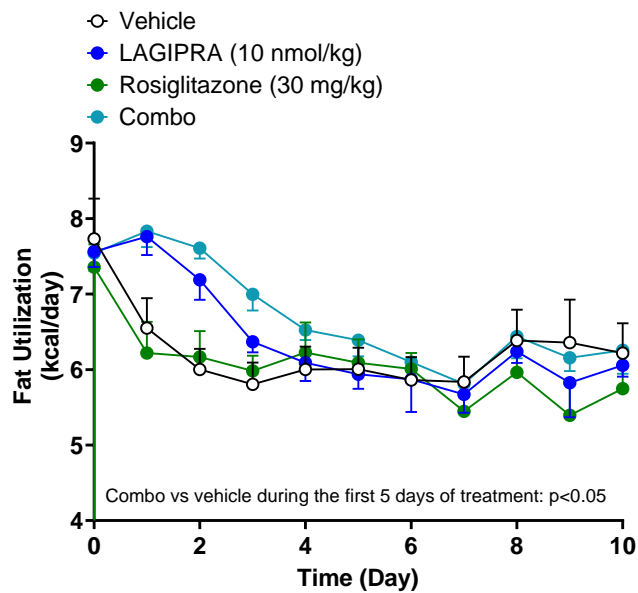**D**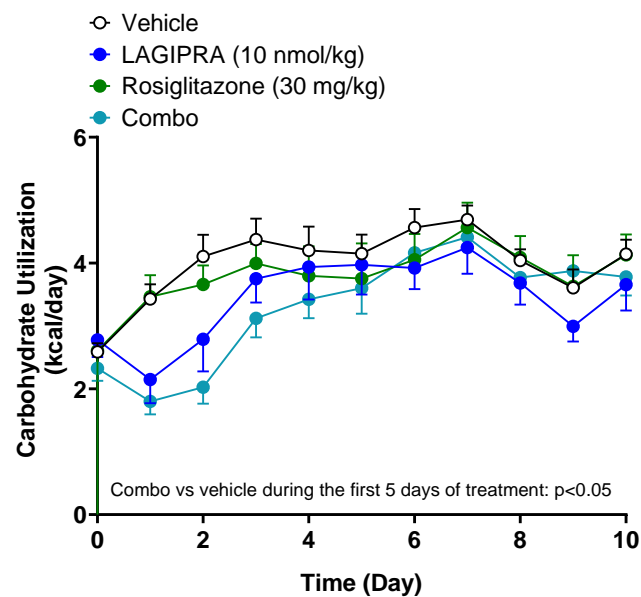

Supplement: Supplementary file 3 [file 1]
